# Supplementary material for: Characterization of candidate genes in inflammatory bowel disease–associated risk loci
Source: JCI journal article supplement (doi:10.1172/jci.insight.87899), 2016-08-17
Supplement: sd6 [file 6]

| Analysis Groups      | Biopsy Location | Un-inflamed | Un-inflamed | Inflamed |
|----------------------|-----------------|-------------|-------------|----------|
|                      |                 | Healthy     | Disease     | Disease  |
| Healthy Vs Crohn's   | TI              | 13          | 156         | 152      |
| Healthy vs Crohn's   | Colon           | 24          | 177         | 79       |
| Healthy vs U.Colitis | Colon           | 24          | 142         | 107      |

  

The diagram illustrates transitions between Un-inflamed and Inflamed states for three analysis groups. Blue arrows indicate transitions, and red numbers represent counts.

- Healthy Vs Crohn's (TI):**
  - Un-inflamed to Inflamed: 6
  - Inflamed to Un-inflamed: 0
  - Un-inflamed to Un-inflamed: 13
  - Un-inflamed to Disease: 6
- Healthy vs Crohn's (Colon):**
  - Un-inflamed to Inflamed: 5
  - Inflamed to Un-inflamed: 2
  - Un-inflamed to Un-inflamed: 24
  - Un-inflamed to Disease: 5
- Healthy vs U.Colitis (Colon):**
  - Un-inflamed to Inflamed: 4
  - Inflamed to Un-inflamed: 1
  - Un-inflamed to Un-inflamed: 24
  - Un-inflamed to Disease: 6
